# Supplementary material
Source: PubMed Central journal article supplement (PMC3650526)

1 **Table S1.** Primers used in this study

| Primer <sup>a</sup>                                      | Oligo sequence (5' to 3') <sup>b</sup>           | Purpose <sup>c</sup>             |
|----------------------------------------------------------|--------------------------------------------------|----------------------------------|
| <b>Mutagenesis</b>                                       |                                                  |                                  |
| Pr1097                                                   | <u>gagatctaga</u> accgtttgatttttaattgataatg      | Janus cassette For               |
| Pr1098                                                   | gagact <u>cgagc</u> ctttccttatgcttttgac          | Janus cassette Rev               |
| Pr1836                                                   | <u>gagagtcgac</u> accgtttgatttttaattgataatg      | Janus cassette For               |
| Pr1837                                                   | gagac <u>catggc</u> ctttccttatgcttttgac          | Janus cassette Rev               |
| Pr2841                                                   | actacatcacaatggctgcc                             | <i>pdxT</i> upstream For         |
| Pr2842                                                   | aaat <u>ctagacc</u> gattttcatctattttcc           | <i>pdxT</i> upstream Rev         |
| Pr2843                                                   | aaact <u>cgagttg</u> agattgaatttctcaac           | <i>pdxT</i> downstream For       |
| Pr2844                                                   | accagttttgctctatgctc                             | <i>pdxT</i> downstream Rev       |
| Pr2845                                                   | gaagcctttgaacgtcttg                              | <i>pdxS</i> upstream For         |
| Pr2846                                                   | aaat <u>ctagac</u> caccacctgagcatctg             | <i>pdxS</i> upstream Rev         |
| Pr2847                                                   | aaact <u>cgagt</u> tattaatgaaaatgaaatcc          | <i>pdxS</i> downstream For       |
| Pr2848                                                   | tggcctatggttcgaccac                              | <i>pdxS</i> downstream Rev       |
| Pr2919                                                   | gcgatgatcttgcaagagggaat                          | <i>pdxR</i> upstream For         |
| Pr2920                                                   | cgcg <u>ctcgac</u> acggatagaaggcaggcgactac       | <i>pdxR</i> upstream Rev         |
| Pr2921                                                   | cgcg <u>ccatggc</u> acagtaactgggcttggga          | <i>pdxR</i> downstream For       |
| Pr2922                                                   | aacactgacaagtaactggatg                           | <i>pdxR</i> downstream Rev       |
| <b>Complementation</b>                                   |                                                  |                                  |
| Pr2967                                                   | tttt <u>gtcgaca</u> actacatcacaatggctgc          | <i>pdxS</i> promoter and ORF For |
| Pr2838                                                   | cggg <u>gatcc</u> gttctgcaaaggccccttgc           | <i>pdxS</i> promoter and ORF Rev |
| Pr2968                                                   | tttt <u>gtcgaca</u> taaaaggccagccatcaagg         | <i>pdxR</i> promoter and ORF For |
| Pr2969                                                   | cgcg <u>gatcc</u> gcagagttggatgctatcc            | <i>pdxR</i> promoter and ORF Rev |
| <b>Overexpression</b>                                    |                                                  |                                  |
| Pr2862                                                   | cgcg <u>gctagc</u> atgactgaaaatcggtatga          | <i>pdxS</i> ORF For              |
| Pr2863                                                   | cgcg <u>gatcc</u> cttgcaaggccaatattcc            | <i>pdxS</i> ORF Rev              |
| Pr2864                                                   | cgcg <u>catatg</u> aaaatcggaatattggc             | <i>pdxT</i> ORF For              |
| Pr2865                                                   | cgcg <u>gatcca</u> atacatcgctattgttta            | <i>pdxT</i> ORF Rev              |
| Pr2917                                                   | cgcg <u>ccatgg</u> agaaacaaagcaagtacaaagag       | <i>pdxR</i> ORF For              |
| Pr2918                                                   | cgcg <u>aagctt</u> tccaattctgcttttaaatagtttaaaca | <i>pdxR</i> ORF Rev              |
| <b>Heterogeneous expression in <i>E. coli</i> mutant</b> |                                                  |                                  |
| JY161                                                    | cgcaatattaaaagttaacccttcgacc                     | <i>E. coli crp</i> promoter For  |
| JY170                                                    | cgggctagcgggtacctctagacatgcgcttatcctctg          | <i>E. coli crp</i> promoter Rev  |
| Pr2835                                                   | cggg <u>aattc</u> atgaaaatcggaatattggc           | <i>pdxT</i> ORF For              |
| Pr2854                                                   | cgggctagcaagttgagaaatcaatctc                     | <i>pdxT</i> ORF Rev              |
| Pr2855                                                   | cgg <u>tctaga</u> atgactgaaaatcggtatg            | <i>pdxS</i> ORF For              |
| Pr2838                                                   | cggg <u>gatcc</u> gttctgcaaaggccccttgc           | <i>pdxS</i> ORF Rev              |
| <b>Northern blot</b>                                     |                                                  |                                  |
| Pr2926                                                   | cttagccactactggaactaac                           | <i>pdxS</i> probe                |
| Pr2782                                                   | actttcactctcacactcg                              | 16S rRNA probe                   |

2 <sup>a</sup>*pdxST* double mutant was generated with *pdxS* upstream primers and *pdxT* downstream primers.

3 <sup>b</sup>The restriction site is underlined if presents in an oligo.

4 <sup>c</sup>Two pairs of primers flanking the Janus cassette were used for combination of different  
5 restriction sites. For, forward primer; Rev, reverse primer.

6

6 **FIGURE LEGENDS**

7 **Figure S1.** Western blot analyses to verify the deletion of *pdxT* and *pdxS*. WT (D39) and its  
8 derivatives, including  $\Delta pdxT$  (ST2675),  $\Delta pdxS$  (ST2676) and  $\Delta pdxST$  (ST2677), were initially  
9 grown in complete CDM and then incubated for 4 h in depleted CDM. The protein samples were  
10 analyzed with the indicated antibodies (right side). Blotting with antibody against SPD\_1063  
11 was served as a loading control.

12 **Figure S2.** Growth of bacterial strains on M9 plates in the presence or absence of 0.1 mM PLP.  
13 ec022 is the *E. coli* WT strain. ec048 and ec053 are *E. coli*  $\Delta pdxA$  and  $\Delta pdxJ$ , respectively.  
14 ST2688 and ST2689 express pneumococcal *pdxS* in  $\Delta pdxA$  and  $\Delta pdxJ$ , respectively. Strains  
15 ec061 and ec065 contain the control vector in  $\Delta pdxA$  and  $\Delta pdxJ$ , respectively. Images of plates  
16 were taken after incubation for 18 h at 37 °C

17 **Figure S3.** (A) Putative GntR family proteins in *S. pneumoniae*. All these proteins have a  
18 wHTH motif as a signature of GntR family proteins. Three proteins have an UbiC transcription  
19 regulator-associated (UTRA) domain. SPD\_1225 has an AAT domain. (B) Verification of  
20 deletion and complementation of *pdxS* and *pdxR*, respectively, using PCR. Internal primers of  
21 *pdxR* and *pdxS* were used for PCR. Bacterial DNA samples isolated from the indicated strains,  
22 including WT (D39), ST2726 ( $\Delta pdxR$ ), ST2786 ( $\Delta pdxR/pdxR+$ ), ST2787 ( $\Delta pdxR$ /vector control),  
23 ST2676 ( $\Delta pdxS$ ), ST2784 ( $\Delta pdxS/pdxS+$ ) and ST2785 ( $\Delta pdxS$ /vector control), were used as  
24 templates.

25 **Figure S4.** Growth curve of ST2676 (A) and ST2726 (B) in complete CDM. The bacterial  
26 strains tested include WT (D39), ST2676 ( $\Delta pdxS$ ), ST2784 ( $\Delta pdxS/pdxS+$ ) and ST2785  
27 ( $\Delta pdxS$ /vector control), ST2726 ( $\Delta pdxR$ ), ST2786 ( $\Delta pdxR/pdxR+$ ), ST2787 ( $\Delta pdxR$ /vector

28 control). The bacterial growth was monitored hourly at  $OD_{620}$ . Data shown are the means of  
29 three repeat experiments. Error bars denote SEM.

30

30 FIG. S1

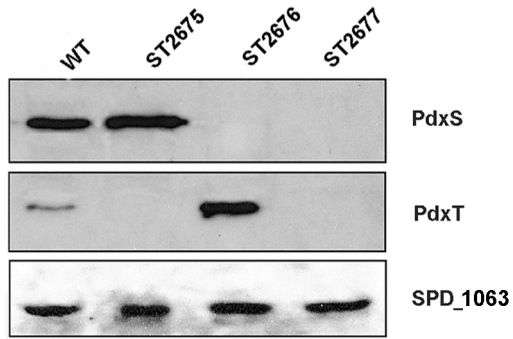

31

32 FIG. S2

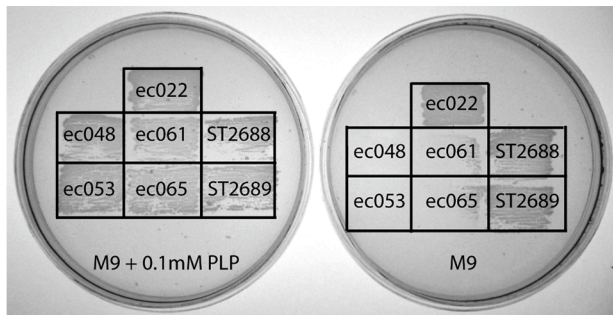

33

34 FIG. S3

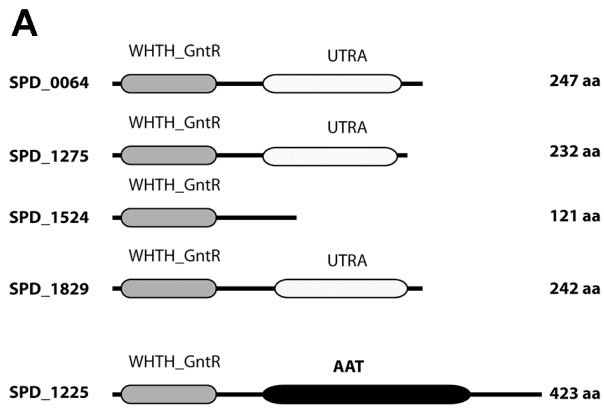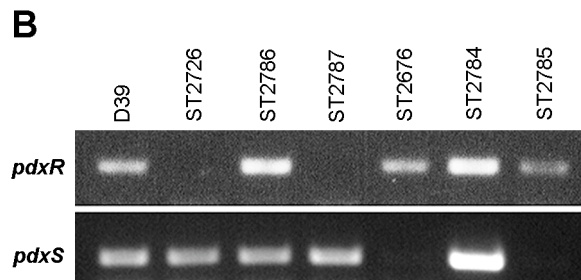

35

36

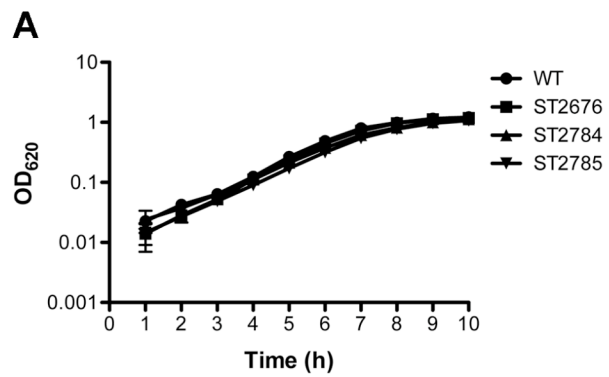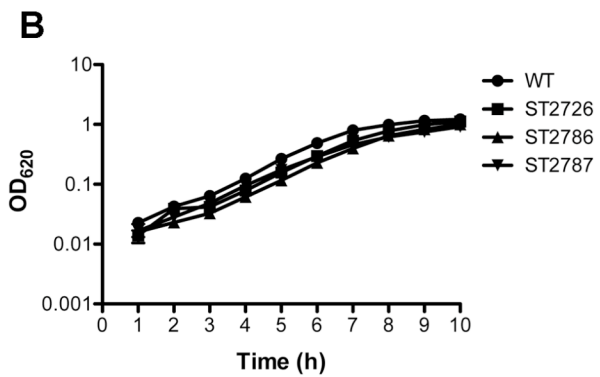

Supplement: JB.00041-13_zjb999092571so1.pdf [file JB.00041-13_zjb999092571so1.pdf]
